# Supplementary material
Source: PubMed Central journal article supplement (PMC5714141)

**Supplementary Figure 1:** Immunohistochemical analyses of collagen type I in cartilage-like microtissues with respect to different culture medium conditions (red: collagen type I; blue: cell nuclei stained with DAPI). Scale bars = 200  $\mu\text{m}$ .

### Collagen type I

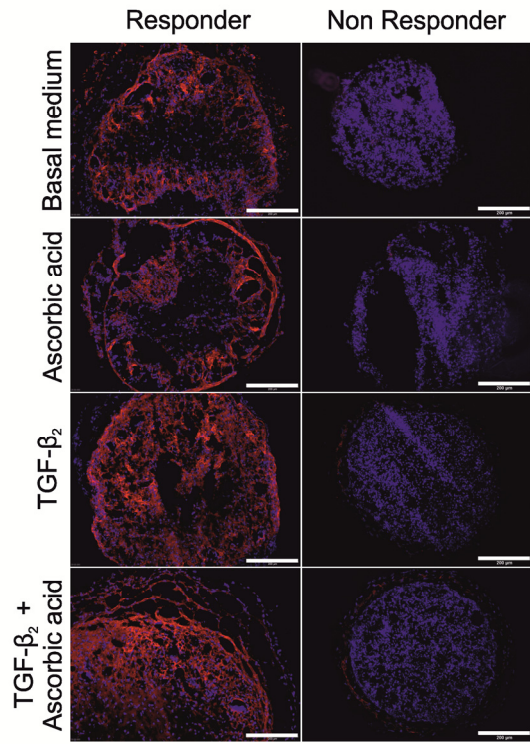

Supplement: supplementary_material_1.pdf [file supplementary_material_1.pdf]
